# Supplementary material for: Are we there yet with patent foramen ovale closure for secondary prevention in cryptogenic stroke? A systematic review and meta-analysis of randomized trials
Source: PubMed Central journal article supplement — SAGE Open Med. 2019 Feb 4;7:2050312119828261. doi: 10.1177/2050312119828261 (PMC6365999; doi:10.1177/2050312119828261), 2019-02-04

## Supplementary Data

### Table of contents

1. Search Strategy
  - a. PubMed Search Strategy
  - b. Database Search Strategy
    - i. Database: EMBASE <1988 to 2017 Week 48>
    - ii. EBM Reviews - Cochrane Database of Systematic Reviews <2005 to November 22, 2017>
  - c. Web of Science Search Strategy
2. Risk Bias Assessment
  - a. Stroke
    - i. Bias indicators
    - ii. Funnel & L'Abbe plots
  - b. Transient Ischemic Attack (TIA)
    - i. Bias indicators
    - ii. Funnel & L'Abbe plots
  - c. Composite of TIA, stroke and peripheral embolism outcomes
    - i. Bias indicators
    - ii. Funnel & L'Abbe plots

### Search Strategy:

**PubMed Search Strategy:** (((((((("Prostheses and Implants"[Mesh] OR "Vascular Closure Devices"[Mesh]) OR (percutaneous[All Fields] AND ("equipment and supplies"[MeSH Terms] OR ("equipment"[All Fields] AND "supplies"[All Fields]) OR "equipment and supplies"[All Fields] OR "device"[All Fields]))) OR (percutaneous[All Fields] AND closure[All Fields])) OR "Cardiac Catheterization"[Mesh]) OR (starflex[All Fields] AND septal[All Fields] AND closure[All Fields] AND system[All Fields])) OR "Septal Occluder Device"[Mesh]) OR starflex[All Fields]) OR amplatzer[All Fields]) AND (((("Foramen Ovale, Patent"[Mesh] OR "Foramen Ovale"[Mesh]) OR ("foramen ovale, patent"[MeSH Terms] OR ("foramen"[All Fields] AND "ovale"[All Fields] AND "patent"[All Fields]) OR "patent foramen ovale"[All Fields] OR ("patent"[All Fields] AND "foramen"[All Fields] AND "ovale"[All Fields]))) OR ("foramen ovale"[MeSH Terms] OR ("foramen"[All Fields] AND "ovale"[All Fields]) OR "foramen ovale"[All Fields]))) AND Randomized Controlled Trial[ptyp]

**Database: Embase <1988 to 2017 Week 48>**

**Search Strategy:**

-----  
1 exp patent foramen ovale/ (6038)

- 2 patent foramen ovale.mp. (8428)
- 3 heart foramen ovale/ (1355)
- 4 foramen ovale.mp. (10222)
- 5 (prostheses and implants).mp. [mp=title, abstract, heading word, drug trade name, original title, device manufacturer, drug manufacturer, device trade name, keyword, floating subheading word] (8351)
- 6 exp devices/ (2686767)
- 7 percutaneous device.mp. (440)
- 8 percutaneous closure.mp. (2854)
- 9 exp heart catheterization/ (47052)
- 10 starflex septal closure system.mp. (11)
- 11 exp septal occluder/ (2746)
- 12 starflex.mp. (368)
- 13 amplatzer.mp. (6225)
- 14 1 or 2 or 3 or 4 (10222)
- 15 5 or 6 or 7 or 8 or 9 or 10 or 11 or 12 or 13 (2720119)
- 16 14 and 15 (3967)
- 17 limit 16 to randomized controlled trial (41)

**Database: EBM Reviews - Cochrane Database of Systematic Reviews <2005 to November 22, 2017> Search Strategy:**

- 
- 1 [exp patent foramen ovale/] (0)
  - 2 patent foramen ovale.mp. (7)
  - 3 [heart foramen ovale/] (0)
  - 4 foramen ovale.mp. (10)
  - 5 (prostheses and implants).mp. [mp=title, abstract, full text, keywords, caption text] (78)
  - 6 [exp devices/] (0)
  - 7 percutaneous device.mp. (3)
  - 8 percutaneous closure.mp. (2)
  - 9 [exp heart catheterization/] (0)
  - 10 starflex septal closure system.mp. (1)
  - 11 [exp septal occluder/] (0)
  - 12 starflex.mp. (1)
  - 13 amplatzer.mp. (3)
  - 14 1 or 2 or 3 or 4 (10)
  - 15 5 or 6 or 7 or 8 or 9 or 10 or 11 or 12 or 13 (83)
  - 16 14 and 15 (1)
  - 17 randomized controlled trial.mp. [mp=title, short title, abstract, full text, keywords, caption text] (2927)
  - 18 16 and 17 (1)

**Web of Science Search Strategy:** ((TOPIC: ("foramen ovale" OR "patent foramen ovale") AND TOPIC: (((device OR closure) OR "septal occluder") OR starplex) OR amplatzer)) AND TOPIC: ((rct OR "randomized controlled trial") OR "randomized control trial"))

| DATABASE                                | RESULTS | DUPLICATES | REMAINING |
|-----------------------------------------|---------|------------|-----------|
| PubMed                                  | 25      | 14         | 11        |
| Embase                                  | 41      | 3          | 38        |
| Web of Science                          | 24      | 3          | 21        |
| Cochrane Database of Systematic Reviews | 1       | 0          | 1         |
| <b>TOTAL</b>                            | 91      | 20         | 71        |

### **Risk of Bias Assessment:**

#### **1)Stroke:**

##### Bias indicators

Begg-Mazumdar: Kendall's tau = -0.8 P = 0.0167 (low power)

Egger: bias = -2.603378 (95% CI = -6.356463 to 1.149707) P = 0.1144

Harbord-Egger: bias = -3.846727 (92.5% CI = -11.992195 to 4.298741) P = 0.2949

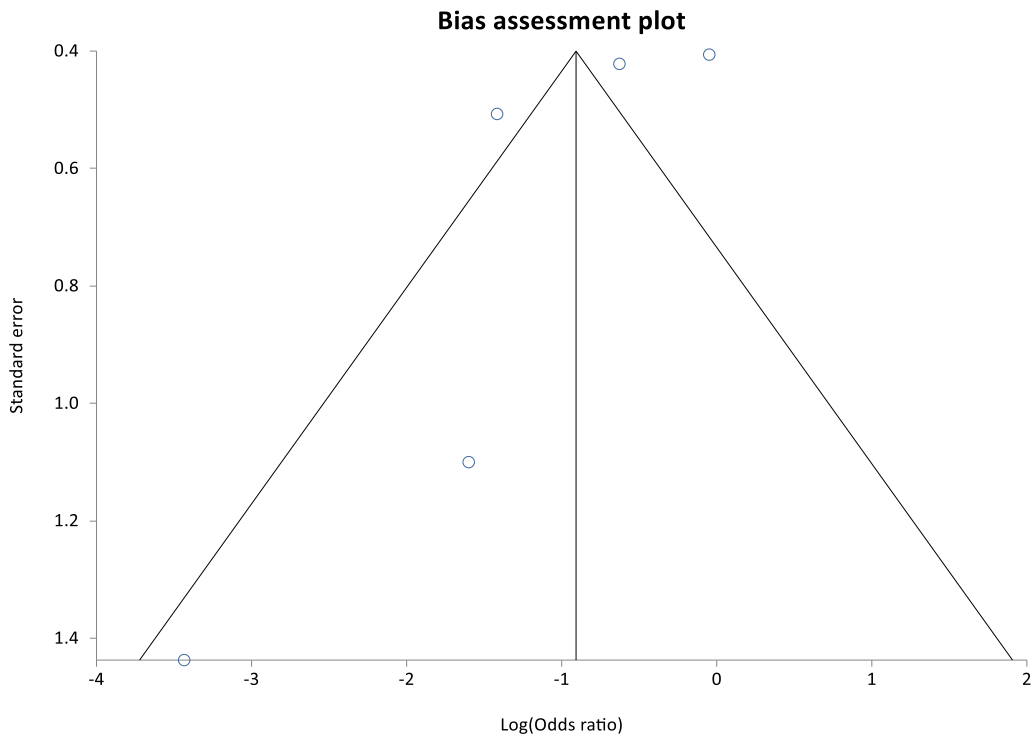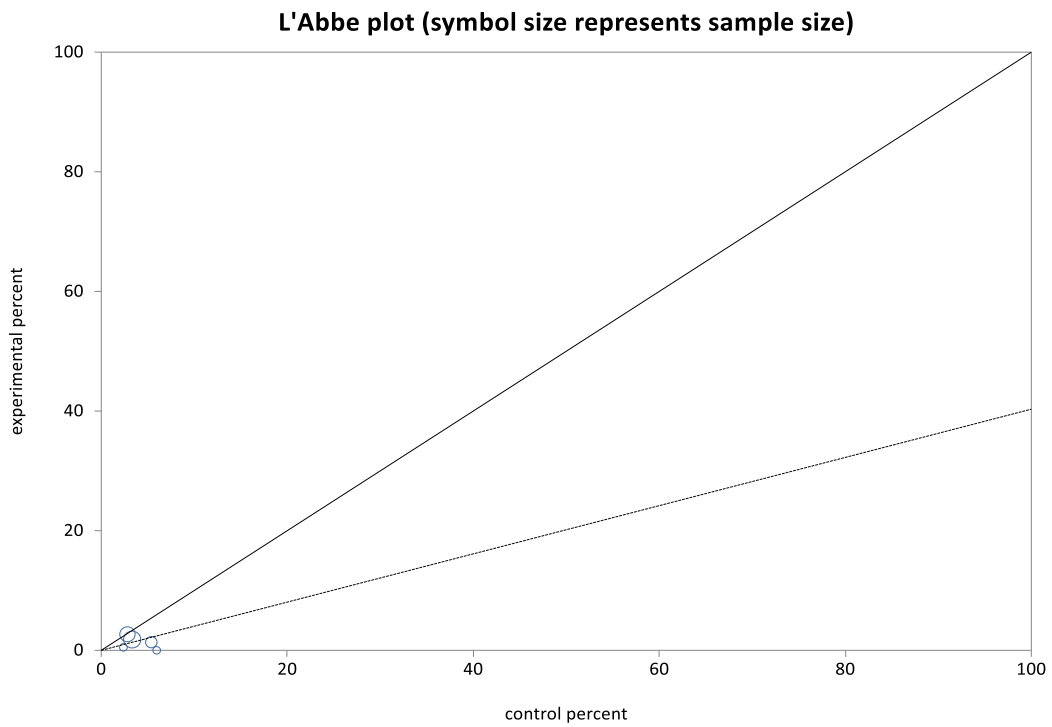

## 2)TIA:

### Bias indicators

Begg-Mazumdar: Kendall's tau = 0.4 P = 0.4833 (low power)

Egger: bias = 1.033054 (95% CI = -2.598693 to 4.664801) P = 0.4321

Harbord-Egger: bias = 1.039475 (92.5% CI = -2.075886 to 4.154835) P = 0.437

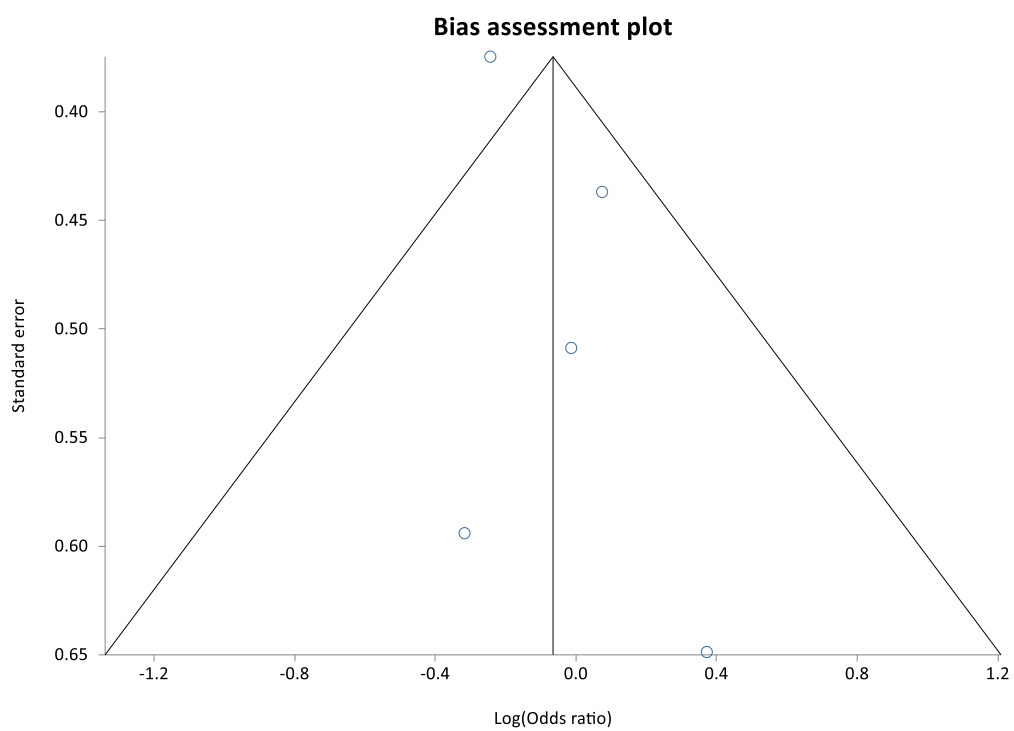

L'Abbe plot (symbol size represents sample size)

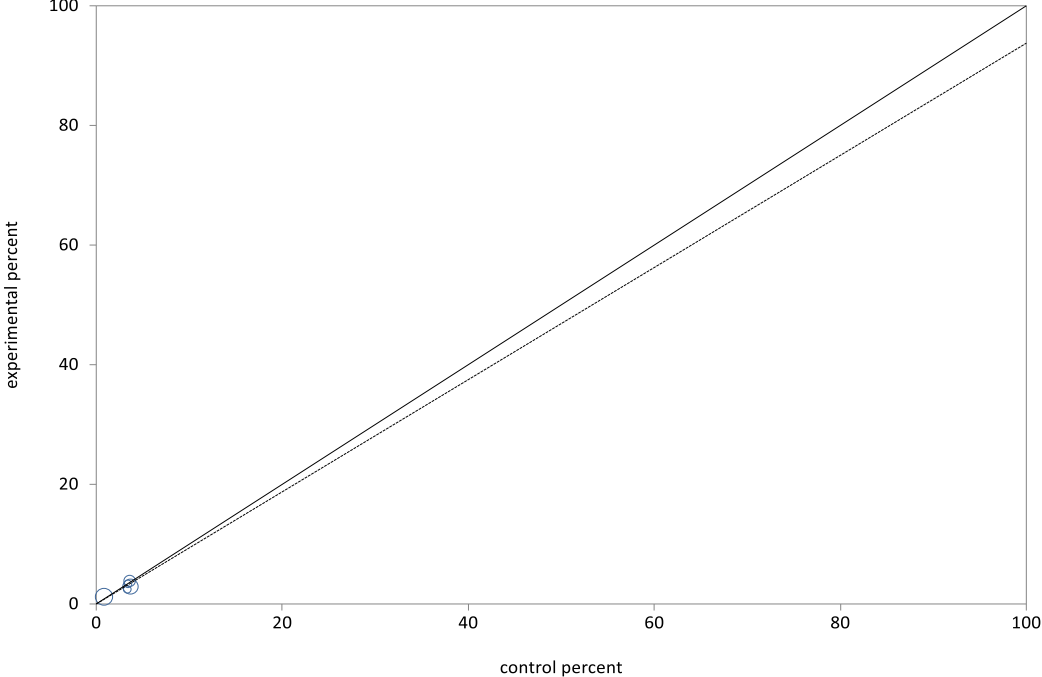

### 3) Composite of TIA,Stroke & peripheral embolism

Bias indicators

Begg-Mazumdar: Kendall's tau = -0.4 P = 0.2333 (low power)

Egger: bias = -2.592767 (95% CI = -8.467407 to 3.281873) P = 0.2548

Harbord-Egger: bias = -2.551823 (92.5% CI = -8.758464 to 3.654817) P = 0.3509

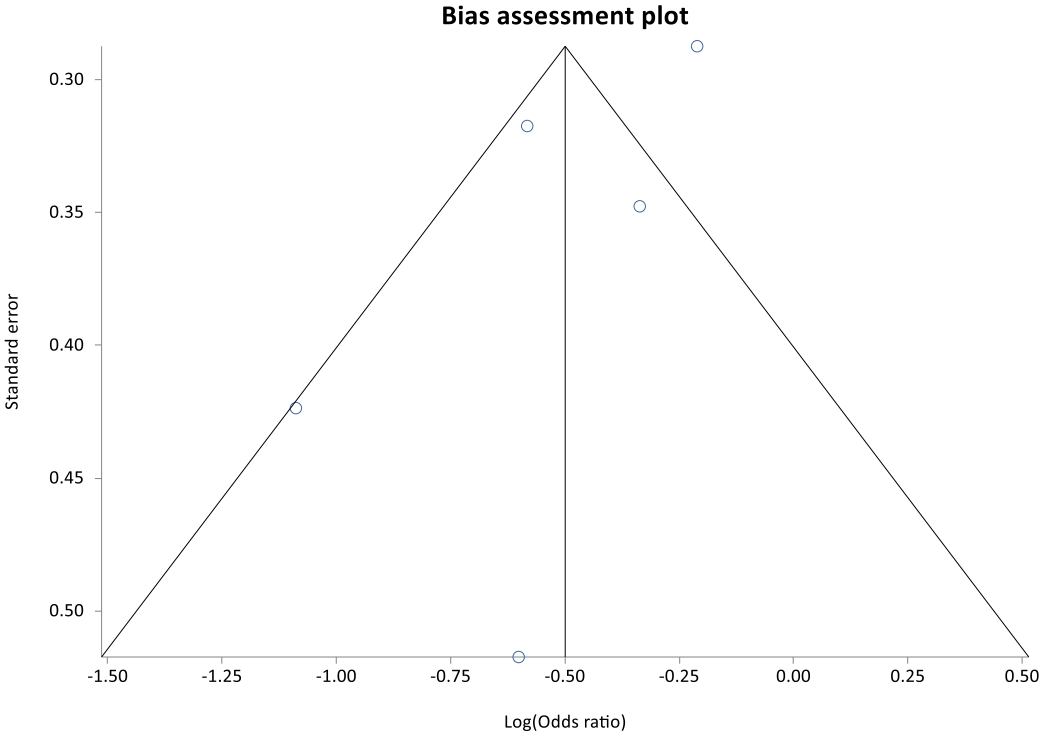

L'Abbe plot (symbol size represents sample size)

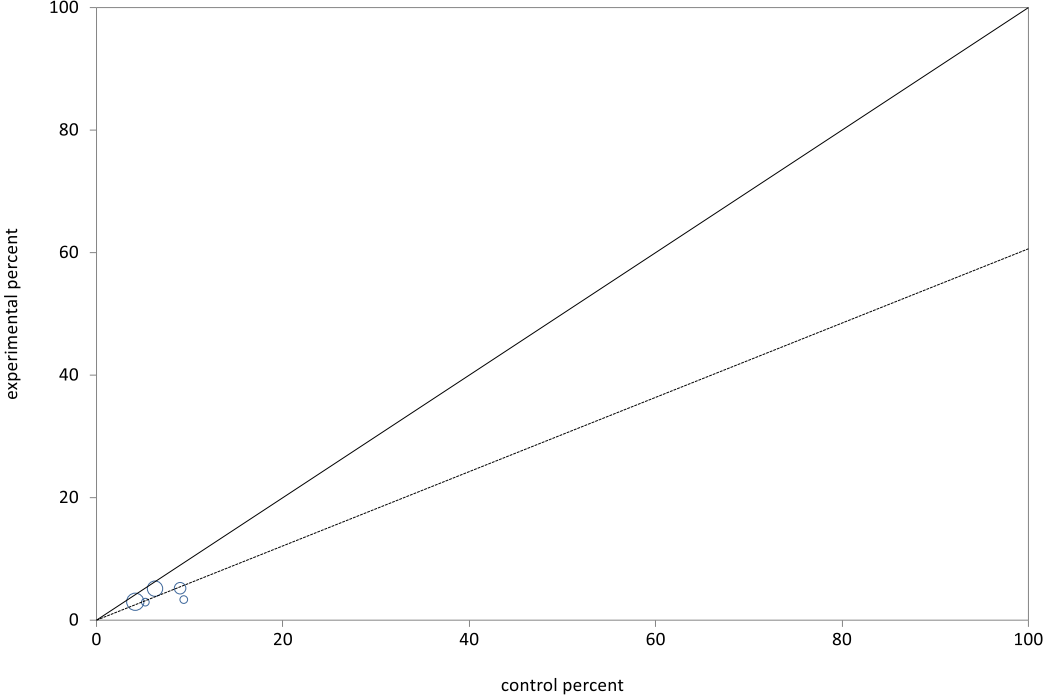

Supplement: Supplementary_Data.pdf [file Supplementary_Data.pdf]
